# Supplementary material for: Aspergillus korhogoensis, a Novel Aflatoxin Producing Species from the Côte d’Ivoire
Source: PubMed Central journal article supplement (PMC5705968; doi:10.3390/toxins9110353), 2017-10-31
Supplement: toxins-09-00353-s001.pdf [file toxins-09-00353-s001.pdf]

## Supplementary Materials: *Aspergillus korhogoensis*, a Novel Aflatoxin Producing Species from the Côte d'Ivoire

Amaranta Carvajal-Campos, Ama Lethicia Manizan, Souria Tadrist, David Koffi Akaki, Rose Koffi-Nevry, Geromy G. Moore, Stephen O. Fapohunda, Sylviane Bailly, Didier Montet, Isabelle P. Oswald, Sophie Lorber, Catherine Brabet and Olivier Puel

Table S1. Primers used to amplify multiple genomic regions within *Aspergillus* species.

| Gene          | Length bp* | Primers | Sequence                              | Reference  |
|---------------|------------|---------|---------------------------------------|------------|
| <i>ITS</i>    | 1152       | Its1    | 5' – GGAAGTAAAGTCGTAACAAGG-3'         | [1]        |
|               |            | D2r     | 5' – TTGGTCCGTTTCAAGACG-3'            | [2]        |
| <i>benA</i>   | 541        | Btub2a  | 5' – GGTAACCAAATCGGTGCTGCTTTC-3'      | [3]        |
|               |            | Btub2b  | 5' – ACCCTCAGTGTAGTGACCCTTGGC-3'      | [3]        |
| <i>cmdA</i>   | 543        | cmd5    | 5' – CCGAGTACAAGGAGGCCTTC-3'          | [4]        |
|               |            | cmd6    | 5' – CCGATAGAGGTCATAACGTGG-3'         | [4]        |
| <i>rpb1</i>   | 860        | FORWARD | 5' – GARTGYCCDGGDCAYTTYGG-3'          | This study |
|               |            | REVERSE | 5' – CCNGCDATNTRTTRTCCATRTA-3'        | This study |
| <i>mcm7</i>   | 544        | mcmF    | 5' – CAATGCCTACACTGTGATCGC-3'         | This study |
|               |            | mcmR    | 5' – CTCCAATGAGCAAAAGAAGCAAG-3'       | This study |
| <i>amdS</i>   | 566        | amdS1   | 5' – CCATCGGTATAGGAACTGA-3'           | [5]        |
|               |            | amdS2   | 5' – AGGGTGCCACGGTATGTC-3'            | [5]        |
| <i>Mat1-1</i> | 241        | M1F     | 5' – ATTGCCATTGGCCTTGAA-3'            | [6]        |
|               |            | MAT1R3* | 5' – ACMGARTARTTGGTMGAAATATCGGCTTC-3' | This study |
| <i>Mat1-2</i> | 645        | MAT2F2* | 5' – GAYGCTYTGGTCACCTYGAG-3'          | This study |
|               |            | M2R     | 5' – GCTTCTTTTCGGATGGCTTGCG-3'        | [6]        |
| <i>preA</i>   | 1336       | PreAF2  | 5' – TGCTSACCATCMCTCCSTTGATCTT-3'     | This study |
|               |            | PreAR3  | 5' – GCTNGTNCCTGCCCATGCATTWG-3'       | This study |
| <i>preB</i>   | 777        | PreBF1  | 5' – ATCCAGATCTGCATCAACT-3'           | This study |
|               |            | PreBR1  | 5' – AGCGGGAGAGAGATAGTGACCAG-3'       | This study |
| <i>ppgA</i>   | 258        | ppgAF   | 5' – GCAGCCACCAGTGTACAGGC-3'          | This study |
|               |            | ppgAR   | 5' – CCATAGCATCCGCAAGGGCATC-3'        | This study |

\* Amplicon size corresponds to *A. flavus* NRRL3357 sequences except for *Mat1-2*. For *Mat1-2*, amplicon size corresponds to *A. bombycis* sequence.

Table S2: Isolates examined and accession numbers deposited in GenBank. In bold sequences recovered from GenBank; normal sequences obtain in this study. <sup>T</sup>= type strain, \* = strains of which the whole genome is sequenced; \*\* = also found under accession number JX456214; / = gene not present.

Table continues in following pages

| SPECIES<br>AND<br>ISOLATE<br>NUMBER | ACCESSION NUMBER |                 |                 |                 |                 |                 |                 |                 |                 |                 |                 |
|-------------------------------------|------------------|-----------------|-----------------|-----------------|-----------------|-----------------|-----------------|-----------------|-----------------|-----------------|-----------------|
|                                     | ITS              | <i>benA</i>     | <i>cmdA</i>     | <i>mcm7</i>     | <i>amdS</i>     | <i>rpb1</i>     | <i>preB</i>     | <i>ppgA</i>     | <i>preA</i>     | <i>Mat1-1</i>   | <i>Mat1-2</i>   |
| <i>A. arachidicola</i>              |                  |                 |                 |                 |                 |                 |                 |                 |                 |                 |                 |
| CBS 117610 <sup>T</sup>             | MF668184         | <b>EF203158</b> | <b>EF202049</b> | MF427568        | <b>GU203491</b> | MF448475        | MF427533        | MF427635        | MF427600        | MF966969        | /               |
| CBS 117614                          | KY937923         | KY924665        | KY924677        | MF427569        | MF427670        | MF448476        | MF427534        | MF427636        | MF427601        | /               | MF448470        |
| <i>A. bertholletius</i>             |                  |                 |                 |                 |                 |                 |                 |                 |                 |                 |                 |
| CCT 7615 <sup>T</sup>               | KY937924         | KY924666        | KY924678        | MF427570        | MF427671        | MF448477        | MF427535        | MF427637        | MF427602        | MF448449        | /               |
| <i>A. bombycis</i>                  |                  |                 |                 |                 |                 |                 |                 |                 |                 |                 |                 |
| NRRL<br>26010 <sup>T</sup>          | <b>AF104444</b>  | <b>AY017547</b> | <b>AY017594</b> | <b>JQ690064</b> | MF427672        | MF448478        | <b>OGM45283</b> | <b>OGM40854</b> | <b>OGM42599</b> | /               | <b>OGM45987</b> |
| <i>A. caelatus</i>                  |                  |                 |                 |                 |                 |                 |                 |                 |                 |                 |                 |
| NRRL<br>25528 <sup>T</sup>          | <b>AF004930</b>  | <b>EF661470</b> | <b>EF661522</b> | <b>JQ690063</b> | MF427673        | MF448479        | MF427536        | MF427638        | MF427603        | MF448450        | /               |
| <i>A. flavus</i>                    |                  |                 |                 |                 |                 |                 |                 |                 |                 |                 |                 |
| NRRL 3518                           | <b>EF661552</b>  | <b>EF661487</b> | <b>EF661510</b> | MF427572        | MF427675        | MF448481        | MF427537        | MF427640        | MF427605        | /               | MF448471        |
| NRRL 4818                           | <b>EF661563</b>  | <b>EF661489</b> | <b>EF661510</b> | MF427571        | MF427674        | MF448480        | MF427538        | MF427639        | MF427604        | MF448451        | /               |
| NRRL 3357*                          | MF966967         | <b>M38265</b>   | <b>EED55330</b> | <b>EED52746</b> | <b>EED48415</b> | <b>EED56055</b> | <b>EED51811</b> | <b>EED56518</b> | <b>EED51899</b> | <b>EED46656</b> | /               |
| <i>A. minisclerotigenes</i>         |                  |                 |                 |                 |                 |                 |                 |                 |                 |                 |                 |
| CBS 117635 <sup>T</sup>             | KY937925         | KY924667        | KY924679        | MF427573        | MF427677        | MF448483        | MF427539        | MF427642        | MF427607        | MF448453        | /               |
| E21                                 | KY937926         | <b>JX456195</b> | <b>JX456196</b> | MF427574        | MF427678        | MF448484        | MF427540        | MF427643        | MF427608        | <b>JX456194</b> | /               |
| E44                                 | KY937927         | <b>JX456210</b> | <b>JX456214</b> | MF427575**      | MF427679        | MF448485        | MF427541        | MF427644        | MF427609        | /               | <b>JX456216</b> |
| E74                                 | KY937928         | <b>JX456211</b> | <b>JX456212</b> | MF427576        | MF427680        | MF448486        | MF427542        | MF427645        | MF427610        | /               | <b>JX456213</b> |
| NRRL 29000                          | KY937929         | KY924668        | KY924680        | MF427577        | MF427676        | MF448482        | MF427543        | MF427641        | MF427606        | MF448452        | /               |
| <i>A. mottae</i>                    |                  |                 |                 |                 |                 |                 |                 |                 |                 |                 |                 |
| MUM<br>10.231 <sup>T</sup>          | <b>JF412768</b>  | <b>HM803086</b> | <b>HM803015</b> | <b>HM803059</b> | MF427681        | MF448487        | MF427544        | MF427646        | MF427611        | <b>HM803042</b> | /               |

| SPECIES<br>AND<br>ISOLATE<br>NUMBER | ACCESSION NUMBER |                 |                     |                 |                 |                     |                 |                 |                     |                 |               |
|-------------------------------------|------------------|-----------------|---------------------|-----------------|-----------------|---------------------|-----------------|-----------------|---------------------|-----------------|---------------|
|                                     | ITS              | <i>benA</i>     | <i>cmdA</i>         | <i>mcm7</i>     | <i>amdS</i>     | <i>rpb1</i>         | <i>preB</i>     | <i>ppgA</i>     | <i>preA</i>         | <i>Mat1-1</i>   | <i>Mat1-2</i> |
| <i>A. novoparasiticus</i>           |                  |                 |                     |                 |                 |                     |                 |                 |                     |                 |               |
| CBS 126849 <sup>T</sup>             | KY937930         | KY924673        | KY924685            | MF427583        | <b>GU203478</b> | MF448490            | MF427549        | MF427649        | MF427614            | MF448456        | /             |
| AFc31                               | <b>KC964099</b>  | KY924669        | KY924681            | MF427579        | <b>KC921994</b> | MF448488            | MF427545        | MF427647        | MF427612            | MF448454        | /             |
| AFc32                               | <b>KC964100</b>  | KY924670        | KY924682            | MF427580        | <b>KC921995</b> | MF448489            | MF427546        | MF427648        | MF427613            | MF448455        | /             |
| LEMI 149                            | KY937931         | KY924671        | KY924683            | MF427581        | MF427682        | MF448491            | MF427547        | MF427650        | MF427615            | MF448457        | /             |
| LEMI 267                            | KY937932         | KY924672        | KY924684            | MF427582        | <b>GU203480</b> | MF448492            | MF427548        | MF427651        | MF427616            | MF448458        | /             |
| <i>A. oryzae</i>                    |                  |                 |                     |                 |                 |                     |                 |                 |                     |                 |               |
| CBS 100925 <sup>T</sup>             | MF668185         | <b>EF203138</b> | <b>EF202055</b>     | MF427584        | MF427683        | MF448493            | MF427550        | MF427652        | MF427617            | MF448459        | /             |
| RIB40*                              | <b>AP007173</b>  | <b>BAE64122</b> | <b>XP_001820302</b> | <b>BAE65095</b> | <b>D10492</b>   | <b>XP_001819667</b> | <b>BAE62296</b> | <b>AP007155</b> | <b>XP_001823505</b> | <b>BAE63328</b> | /             |
| <i>A. parasiticus</i>               |                  |                 |                     |                 |                 |                     |                 |                 |                     |                 |               |
| CBS 100926 <sup>T</sup>             | KY937933         | <b>EF203155</b> | <b>EF202043</b>     | MF427585        | <b>GU203493</b> | MF448494            | MF427551        | MF427653        | MF427618            | /               | MF448472      |
| NRRL 492                            | KY937934         | KY924674        | KY924686            | MF427586        | <b>GU203494</b> | MF448495            | MF427552        | MF427654        | MF427619            |                 | MF495344      |
| <i>A. parvisclerotigenus</i>        |                  |                 |                     |                 |                 |                     |                 |                 |                     |                 |               |
| CBS 121.62 <sup>T</sup>             | MF668183         | <b>EF203130</b> | <b>EF202077</b>     | MF427587        | MF427684        | MF448496            | MF427553        | MF427655        | MF427620            | MF448460        | /             |
| AFc36                               | <b>KC964102</b>  | <b>KC954604</b> | <b>KC954606</b>     | MF427588        | MF427685        | MF448497            | MF427554        | MF427656        | MF427621            | MF448461        | /             |
| MACI8                               | KY689163         | KY628794        | KY661270            | MF427589        | MF427686        | MF448498            | MF427555        | MF427657        | MF427622            | MF448462        | /             |
| MACI221                             | KY689198         | KY628787        | KY661291            | MF427590        | MF427687        | MF448499            | MF427556        | MF427658        | MF427623            | MF495342        | /             |
| MACI258                             | KY689205         | KY628789        | KY661293            | MF427591        | MF427688        | MF448500            | MF427557        | MF427659        | MF427624            | MF495343        | /             |
| SF1                                 | MF668179         | MF521634        | MF521638            | MF521646        | MF521642        | MF521662            | MF521658        | MF521650        | MF521654            | MF537434        | /             |
| SF3                                 | MF668180         | MF521635        | MF521639            | MF521647        | MF521643        | MF521663            | MF521659        | MF521651        | MF521655            | MF537435        | /             |
| SF6                                 | MF668181         | MF521636        | MF521640            | MF521648        | MF521644        | MF521664            | MF521660        | MF521652        | MF521656            | MF537436        | /             |
| SF9                                 | MF668182         | MF521637        | MF521641            | MF521649        | MF521645        | MF521665            | MF521661        | MF521653        | MF521657            | MF537437        | /             |
| <i>A. pseudocaelatus</i>            |                  |                 |                     |                 |                 |                     |                 |                 |                     |                 |               |
| CBS 117616 <sup>T</sup>             | KY937935         | <b>EF203128</b> | <b>EF202037</b>     | MF427592        | MF427689        | MF448501            | MF427558        | MF427660        | MF427625            | MF448463        | /             |
| <i>A. pseudotamarii</i>             |                  |                 |                     |                 |                 |                     |                 |                 |                     |                 |               |
| NRRL 443                            | <b>AF004931</b>  | <b>EF661476</b> | <b>EF661520</b>     | MF427593        | MF427690        | MF448502            | MF427559        | MF427661        | MF427626            | MF448464        | /             |

| SPECIES<br>AND<br>ISOLATE<br>NUMBER                            | ACCESSION NUMBER |                 |                 |                 |                 |             |             |             |             |                 |                 |
|----------------------------------------------------------------|------------------|-----------------|-----------------|-----------------|-----------------|-------------|-------------|-------------|-------------|-----------------|-----------------|
|                                                                | ITS              | <i>benA</i>     | <i>cmdA</i>     | <i>mcm7</i>     | <i>amdS</i>     | <i>rpb1</i> | <i>preB</i> | <i>ppgA</i> | <i>preA</i> | <i>Mat1-1</i>   | <i>Mat1-2</i>   |
| NRRL 25518<br><i>A. sergii</i>                                 | KY937937         | KY924675        | KY924687        | MF427594        | MF427691        | MF448503    | MF427560    | MF427662    | MF427627    | MF448465        | /               |
| MUM<br>10.219 <sup>T</sup><br><i>A. sojae</i>                  | KY937936         | <b>HM803082</b> | <b>HQ340097</b> | <b>HM803071</b> | MF427692        | MF448504    | MF427561    | MF427663    | MF427628    | /               | <b>HM802967</b> |
| CBS 100928 <sup>T</sup><br><i>A. transmontanensis</i>          | MF668186         | <b>KJ175494</b> | <b>KJ175550</b> | MF427595        | <b>GU203490</b> | MF448505    | MF427562    | MF427664    | MF427629    | MF537438        | /               |
| MUM<br>10.214 <sup>T</sup><br><i>A. korhogoensis</i> spp. nov. | <b>JF412771</b>  | <b>HM803101</b> | <b>HM803020</b> | <b>HM803065</b> | MF427693        | MF448506    | MF427563    | MF427665    | MF427630    | <b>HM803050</b> | /               |
| MACI46                                                         | KY689207         | KY628790        | KY661265        | MF427596        | MF427694        | MF448507    | MF427564    | MF427666    | MF427631    | MF448466        | /               |
| MACI219                                                        | KY689208         | KY628791        | KY661266        | MF427597        | MF427695        | MF448508    | MF427565    | MF427667    | MF427632    | /               | MF448474        |
| MACI254 <sup>T</sup>                                           | KY689209         | KY628792        | KY661267        | MF427598        | MF427696        | MF448509    | MF427566    | MF427668    | MF427633    | MF448467        | /               |
| MACI264                                                        | KY689210         | KY628793        | KY661268        | MF427599        | MF427697        | MF448510    | MF427567    | MF427669    | MF427634    | MF448468        | /               |

CBS, Centraalbureau voor Schimmelcultures, Utrecht, The Netherlands; NRRL: National Center for Agricultural Utilization Research, U.S. Department of Agriculture, Peoria, IL, USA; LEMI: Laboratório Especial de Micologia, São Paulo, Brazil; MUM: Micoteca da Universidade de Minho, Braga, Portugal; CCT: Coleção de Cultura Tropical, Campinas, Brazil. SF: Southern Regional Research Center, U.S. Department of Agriculture, New Orleans, USA.

## References

- White, T.J.; Bruns, T.; Lee, S.; Taylor, W. Amplification and direct sequencing of fungal ribosomal RNA genes for phylogenetics. In: Innis, M. (Ed.), PCR Protocols: a Guide to Methods and Applications. Academic Press, San Diego, 1990, pp. 315-322.
- Peterson, S.M. Phylogenetic analysis of *Aspergillus* species using DNA sequences from four loci. *Mycologia* **2008**, *100*, 205-226.
- Glass, N.L.; Donaldson, G.C. Development of primer sets designed for use with the PCR to amplify conserved genes from filamentous ascomycetes. *Appl. Environ. Microbiol.* **1995**, *61*, 1323-30.
- Hong, S.B.; Cho, H.S.; Shin, H.D.; Frisvad, J.C.; Samson, R.A. Novel *Neosartorya* species isolated from soil in Korea. *Int. J. Syst. Evol. Microbiol.* **2006**, *56*, 477-486.
- Geiser, D.M.; Pitt, J.I.; Taylor, J.W. 1998. Cryptic speciation and recombination in the aflatoxin-producing fungus *Aspergillus flavus*. *Proc. Nat. Acad. Sci. U. S. A.* **95**, 388-393.
- Ramirez-Prado, J.H.; Moore, G.G.; Horn, B.W.; Carbone, I. Characterization and population analysis of the mating-type genes in *Aspergillus flavus* and *Aspergillus parasiticus*. *Fungal Genet. Biol.* **2008**, *45*, 1292-1299.
